# Supplementary material for: A Novel Strategy for Detection and Enumeration of Circulating Rare Cell Populations in Metastatic Cancer Patients Using Automated Microfluidic Filtration and Multiplex Immunoassay
Source: PLOS journal article supplement (doi:10.1371/journal.pone.0141166), 2015-10-23
Supplement: S1 (10.1371/journal.pone.0141166.s001) [file journal.pone.0141166.s001]

**Blood  
sample  
preparation**

- Collect 6-9 mL of whole blood.
- Dilute samples to 20mL with PBS-fibrin.

**Circulating  
rare cell  
isolation**

- Filter diluted blood through the membrane at 10-30 mbar.
- Wash cells with PBS.
- Fix cells with formaldehyde (20 min).

**ICC stain  
1**

- Permeabilize cells with 0.2% Triton-X solution in PBS (7 min).
- Incubate in blocking buffer (25 min).
- Incubate with antibody conjugate solution (25 min) to stain for CK and CD45.
- Apply DAPI to stain nuclei.

**Microscopic  
cell analysis**

- Apply cover medium and cover slip.
- Examine fluorescence signals in the blue, green, red, and far-red channels.
- Determine thresholds using control spiked cancer cells and white blood cells.
- Detect and enumerate circulating tumor cells.

**ICC stain  
2**

- Remove cover slip and repeat ICC steps to stain for VIM and CD144.
- Reapply cover slip and repeat microscopic analysis of stained cells.
- Detect and enumerate circulating mesenchymal cells and circulating endothelial cells.

**ICC stain  
3**

- Remove cover slip and proceed with TSA steps to stain for PIWIL2 or TPBG/5T4.
- Incubate in hydrogen peroxide to remove peroxidases and white blood cells (30 min).
- Incubate with the 2<sup>nd</sup> antibody conjugate (25 min) then tyramide-Alexa 488 (25 min).
- Reapply cover slip and repeat microscopic analysis of stained cells.
- Detect and enumerate putative circulating stem cells.
